# Supplementary material
Source: ML conference proceedings conference paper supplement (https://proceedings.neurips.cc/paper_files/paper/2025/hash/7ffade093764c9a59a777c3cbe346b97-Abstract.html)
Supplement: Supplementary file 3 [file ipi-forces.pdf › flashmd-experiments/i-pi/docs/figures/ipi-forces.pdf]

$$f^{(i)} = \sum_{k \in \text{comp.}} w_k \text{RPC}_{n_k \rightarrow n} [\mathbf{f}_k]^{(i)}$$

beads

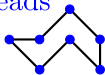

force

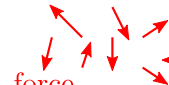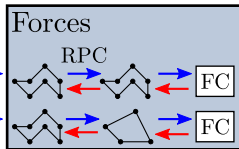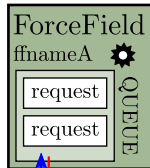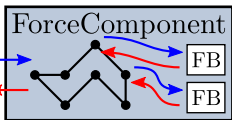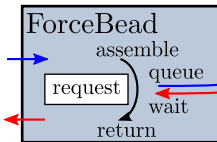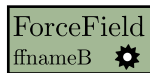

Forces prototypes

- 1) name, weight, nbeads, **ffnameA**
- 2) name, weight, nbeads, **ffnameB**
- ...

Forcefields

- A) parameters, **ffnameA**
- B) parameters, **ffnameB**
- ...
