# Supplementary material
Source: ML conference proceedings conference paper supplement (https://proceedings.neurips.cc/paper_files/paper/2025/hash/7ffade093764c9a59a777c3cbe346b97-Abstract.html)
Supplement: Supplementary file 8 [file ipi-structure-v3.pdf › flashmd-experiments/i-pi/docs/figures/ipi-structure-v3.pdf]

... n replicas

client<sub>1</sub>

client<sub>1</sub><sup>n</sup>

client<sub>2</sub>

client<sub>3</sub>

server: i-PI

FORCEFIELD<sub>1</sub>

FORCEFIELD<sub>2</sub>

FORCEFIELD<sub>3</sub>

SYSTEM

INITIALIZE

BEADS, CELL

FORCES

MOTION

ENSEMBLE

OUTPUTS

```
main loop:
for each system:
    system.motion.step()
    smotion.step()
for each output:
    output.write()
```

SMOTION

$q, h$

$V, f, X$

$q, h$

$V, f, X$

$q, h$

$V, f, X$

$q, h$

$V, f, X$
