# Supplementary material
Source: ML conference proceedings conference paper supplement (https://proceedings.neurips.cc/paper_files/paper/2025/hash/7ffade093764c9a59a777c3cbe346b97-Abstract.html)

# i-PI

# Client

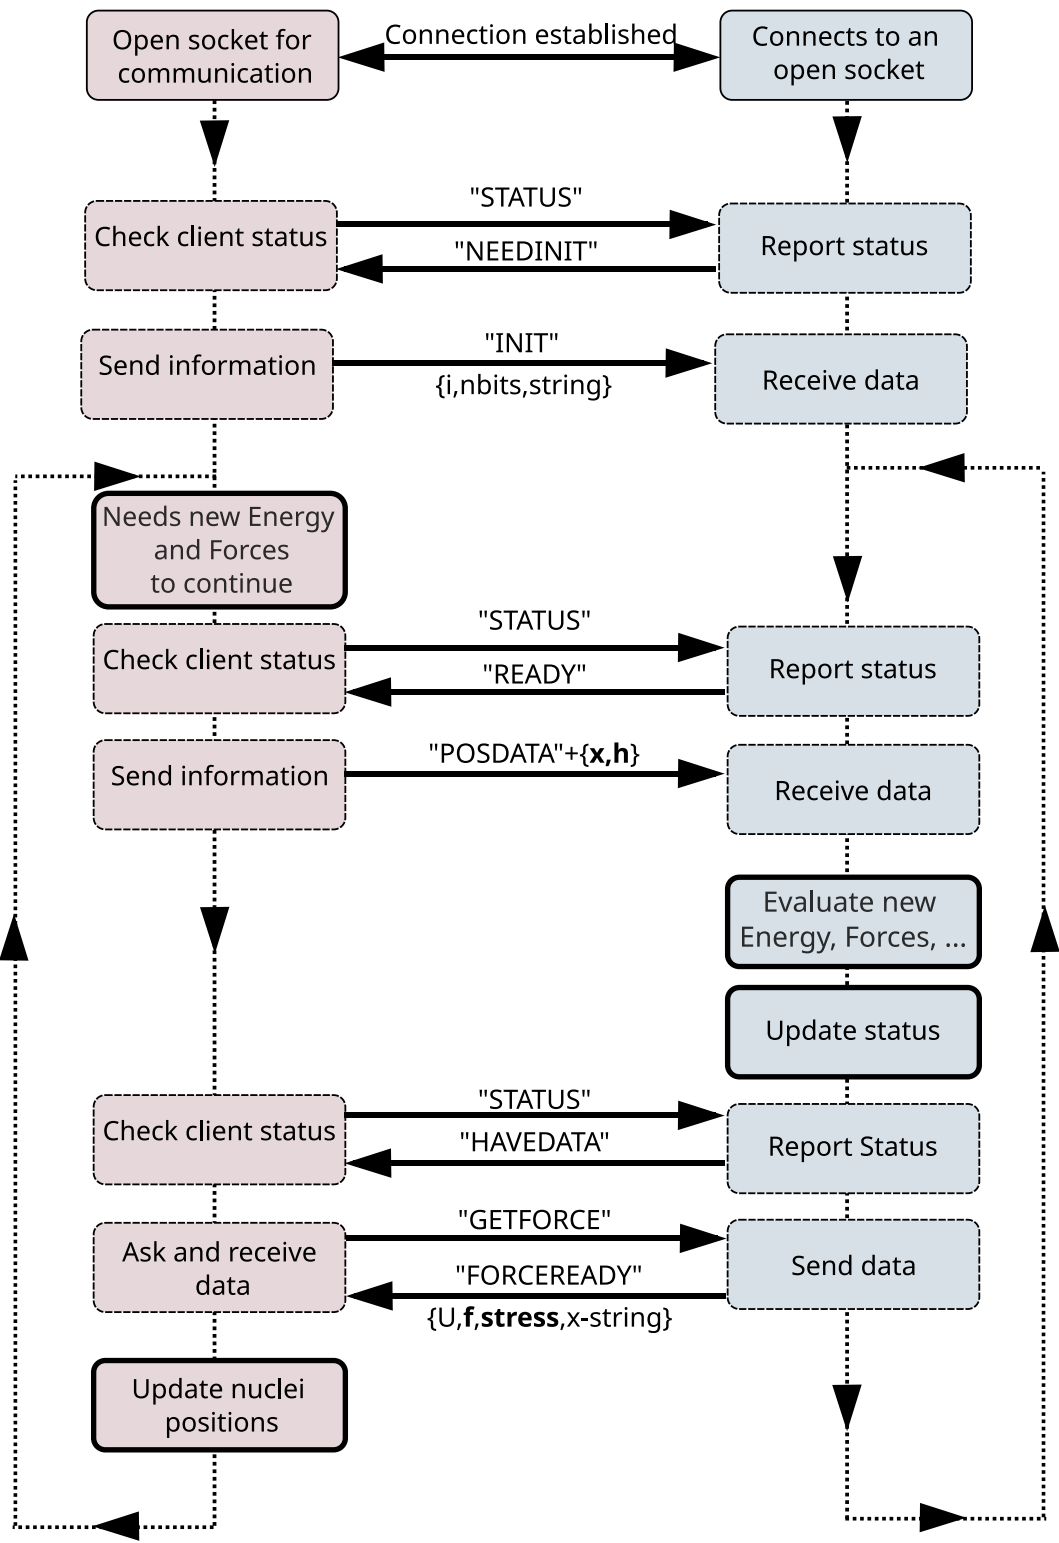

Supplement: Supplementary file 1 [file ipi-comm.pdf › flashmd-experiments/i-pi/docs/figures/ipi-comm.pdf]

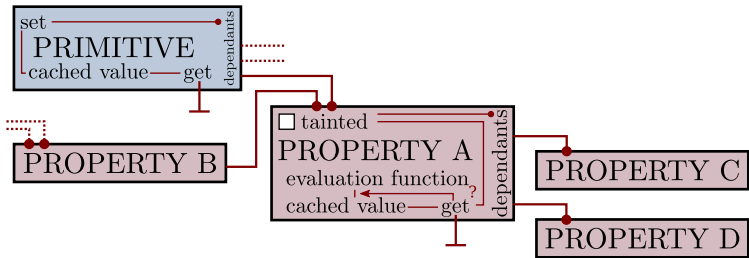

Supplement: Supplementary file 2 [file ipi-depend.pdf › flashmd-experiments/i-pi/docs/figures/ipi-depend.pdf]

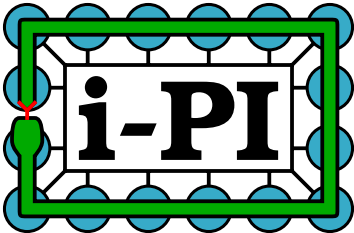

Supplement: Supplementary file 4 [file ipi-logo.pdf › flashmd-experiments/i-pi/docs/figures/ipi-logo.pdf]

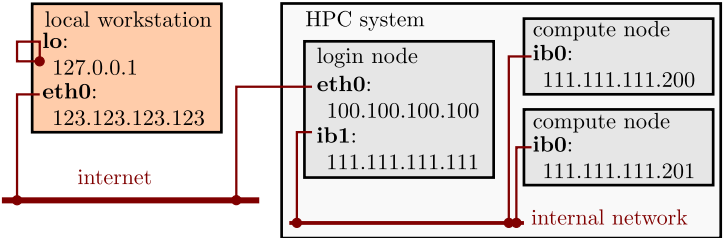

Supplement: Supplementary file 5 [file ipi-network.pdf › flashmd-experiments/i-pi/docs/figures/ipi-network.pdf]

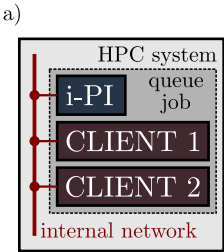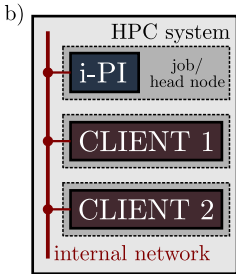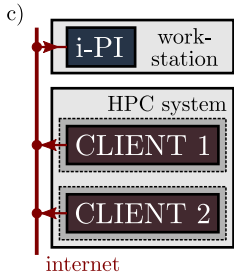

Supplement: Supplementary file 6 [file ipi-running.pdf › flashmd-experiments/i-pi/docs/figures/ipi-running.pdf]

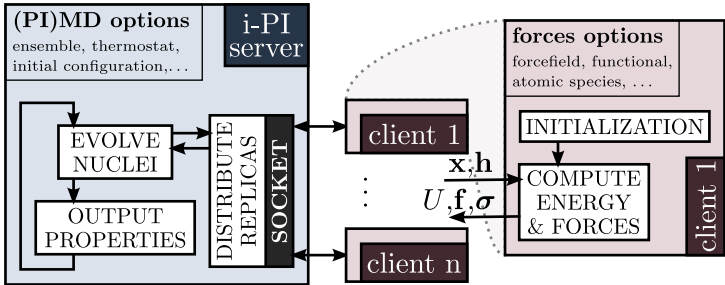

Supplement: Supplementary file 7 [file ipi-scheme.pdf › flashmd-experiments/i-pi/docs/figures/ipi-scheme.pdf]

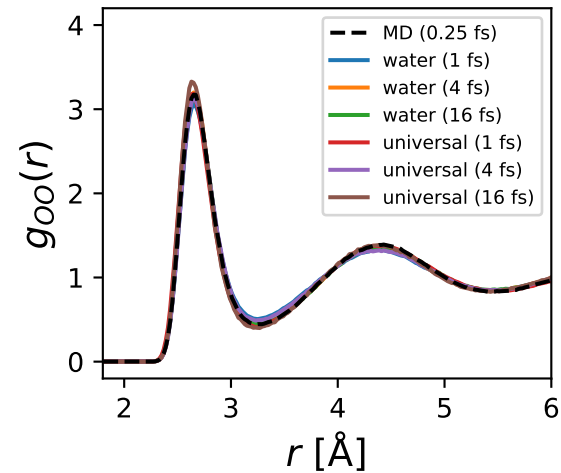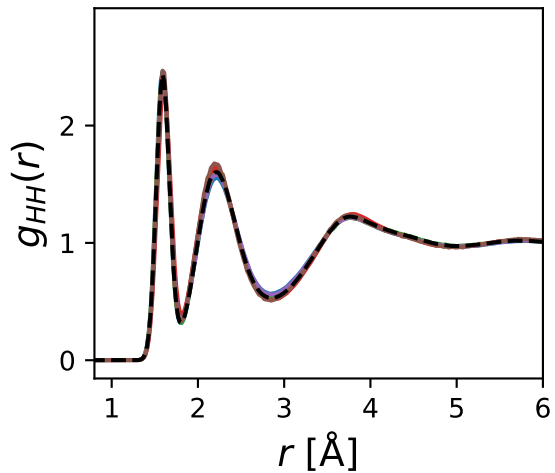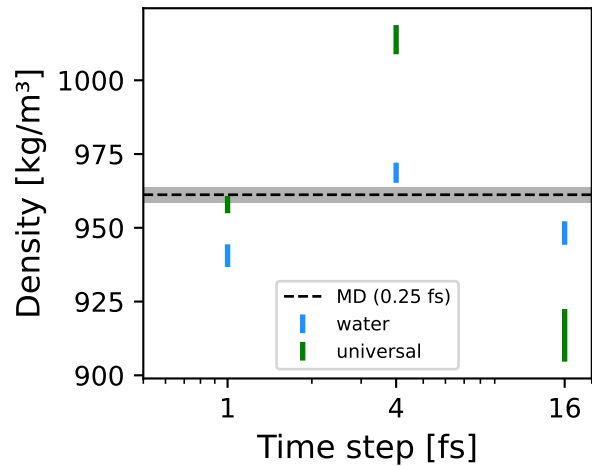

Supplement: Supplementary file 9 [file figure2_water.pdf › flashmd-experiments/plotting/figure2_water.pdf]

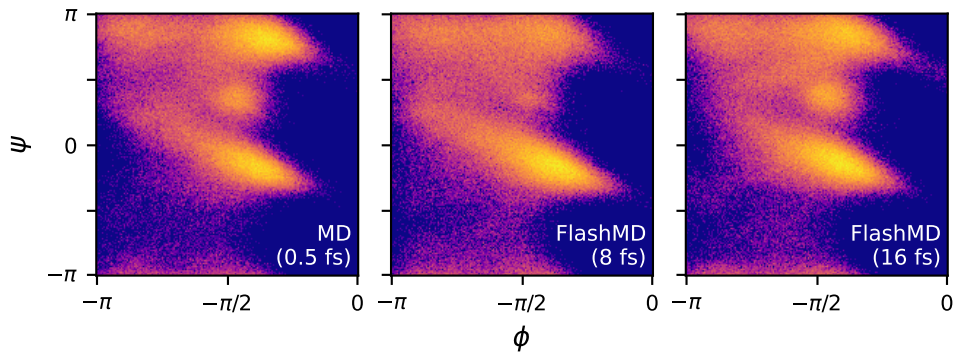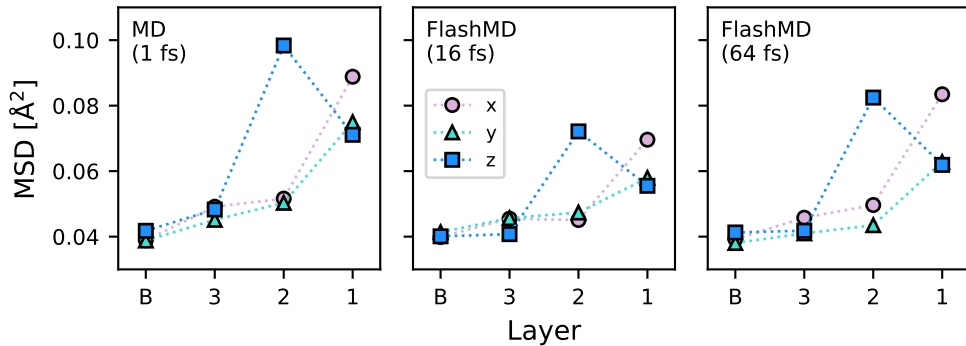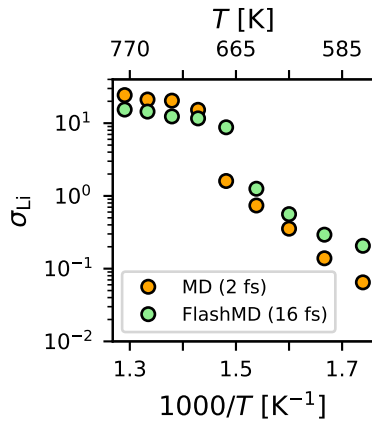

Supplement: Supplementary file 10 [file figure3_universal.pdf › flashmd-experiments/plotting/figure3_universal.pdf]

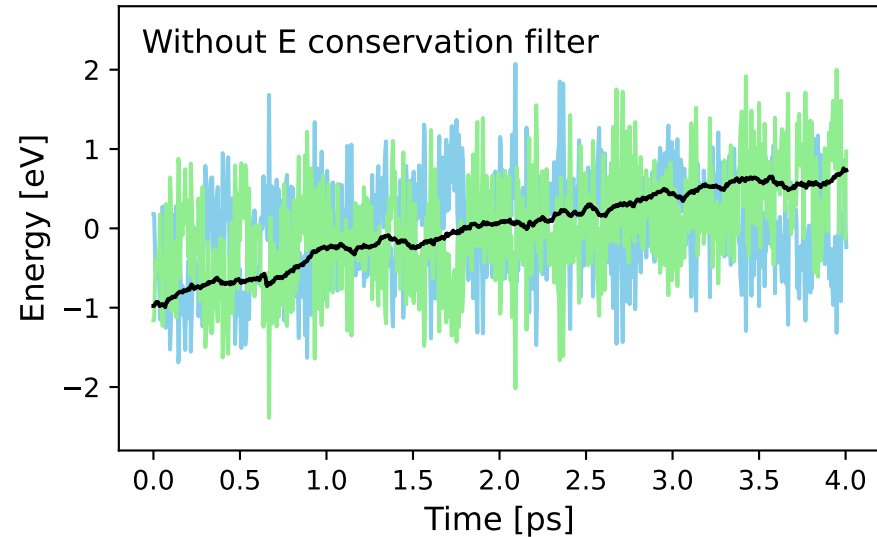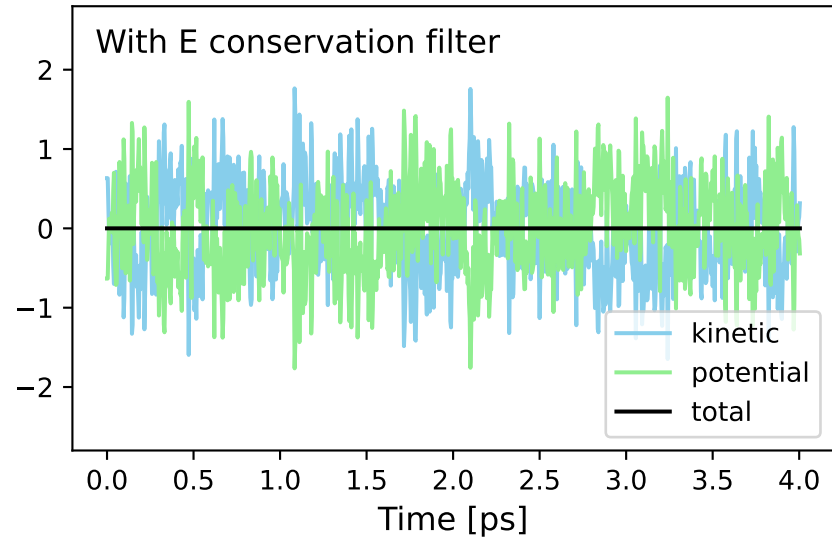

Supplement: Supplementary file 11 [file figure_energy_conservation.pdf › flashmd-experiments/plotting/figure_energy_conservation.pdf]

FlashMD energy [eV]

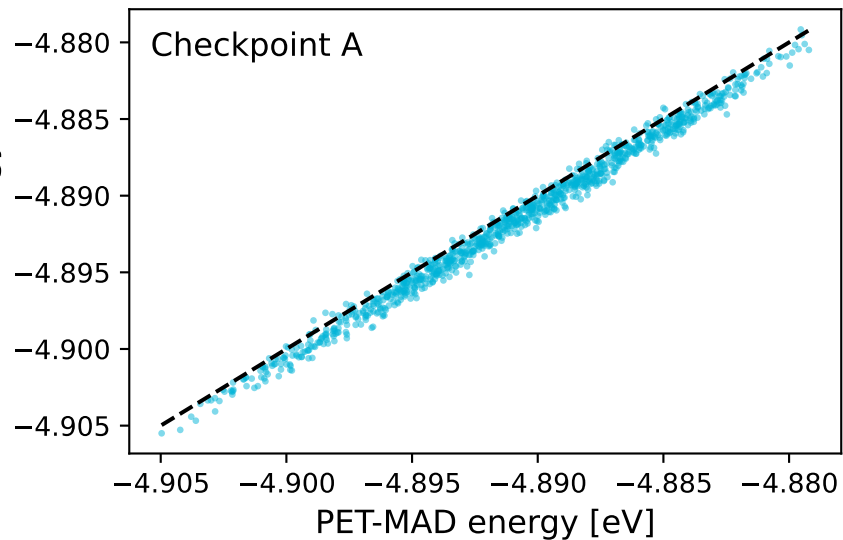

FlashMD energy [eV]

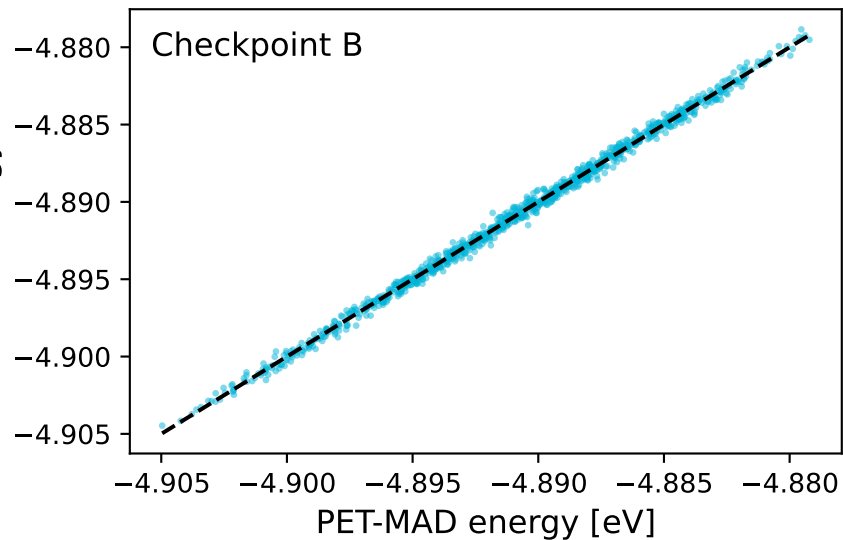

Supplement: Supplementary file 12 [file figure_energy_misalignment.pdf › flashmd-experiments/plotting/figure_energy_misalignment.pdf]

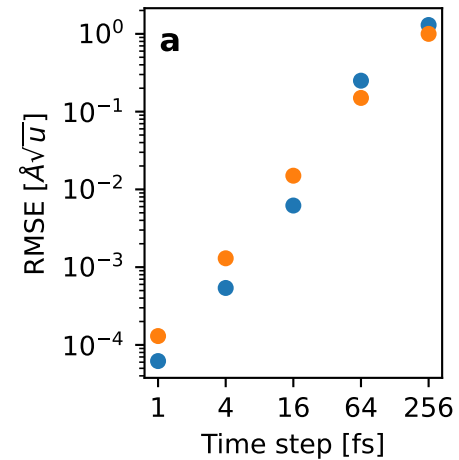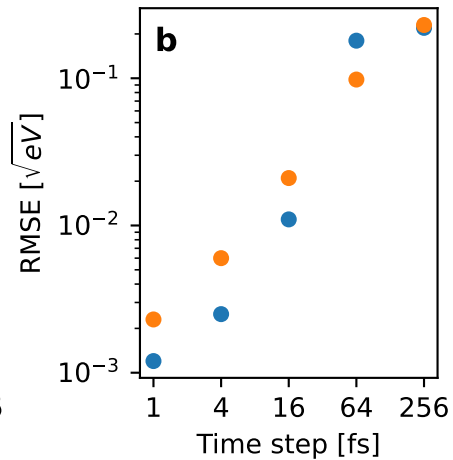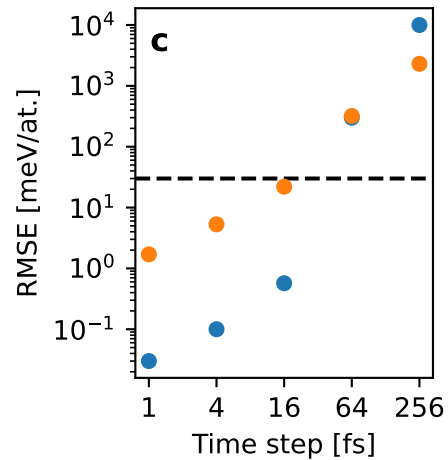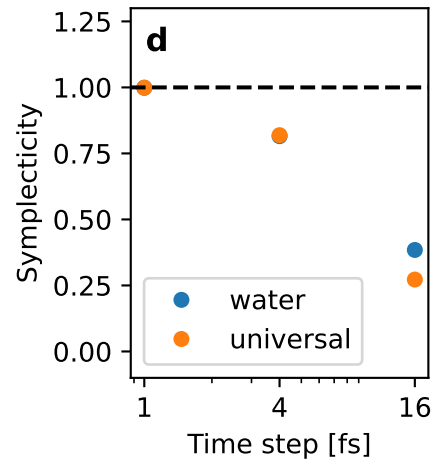

Supplement: Supplementary file 13 [file figure_errors.pdf › flashmd-experiments/plotting/figure_errors.pdf]

$\tau_L = 100$  fs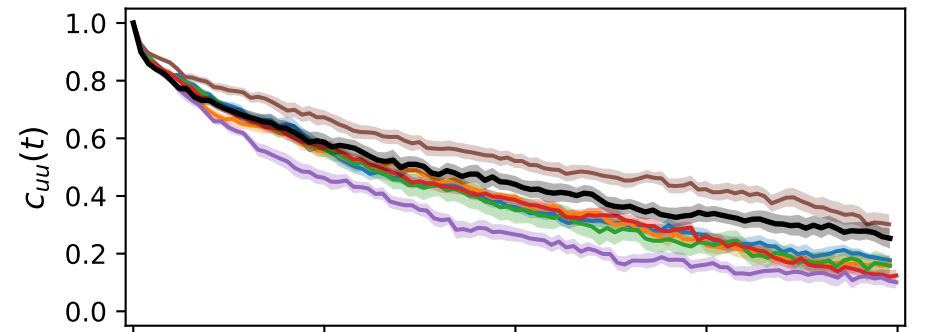 $\tau_L = 1000$  fs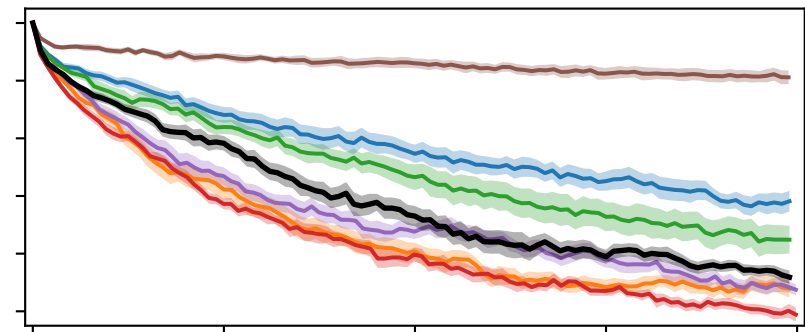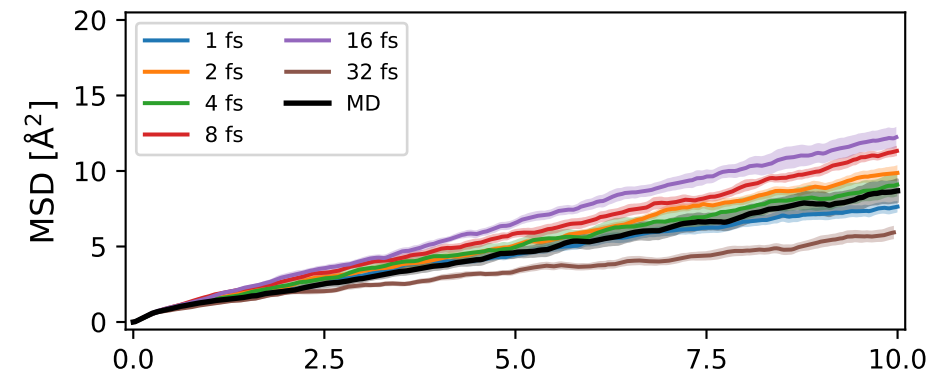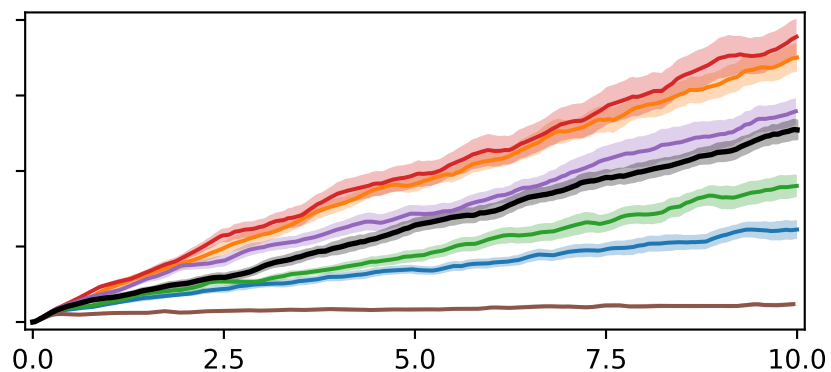

Time [ps]

Supplement: Supplementary file 14 [file figure_qtip4pf.pdf › flashmd-experiments/plotting/figure_qtip4pf.pdf]

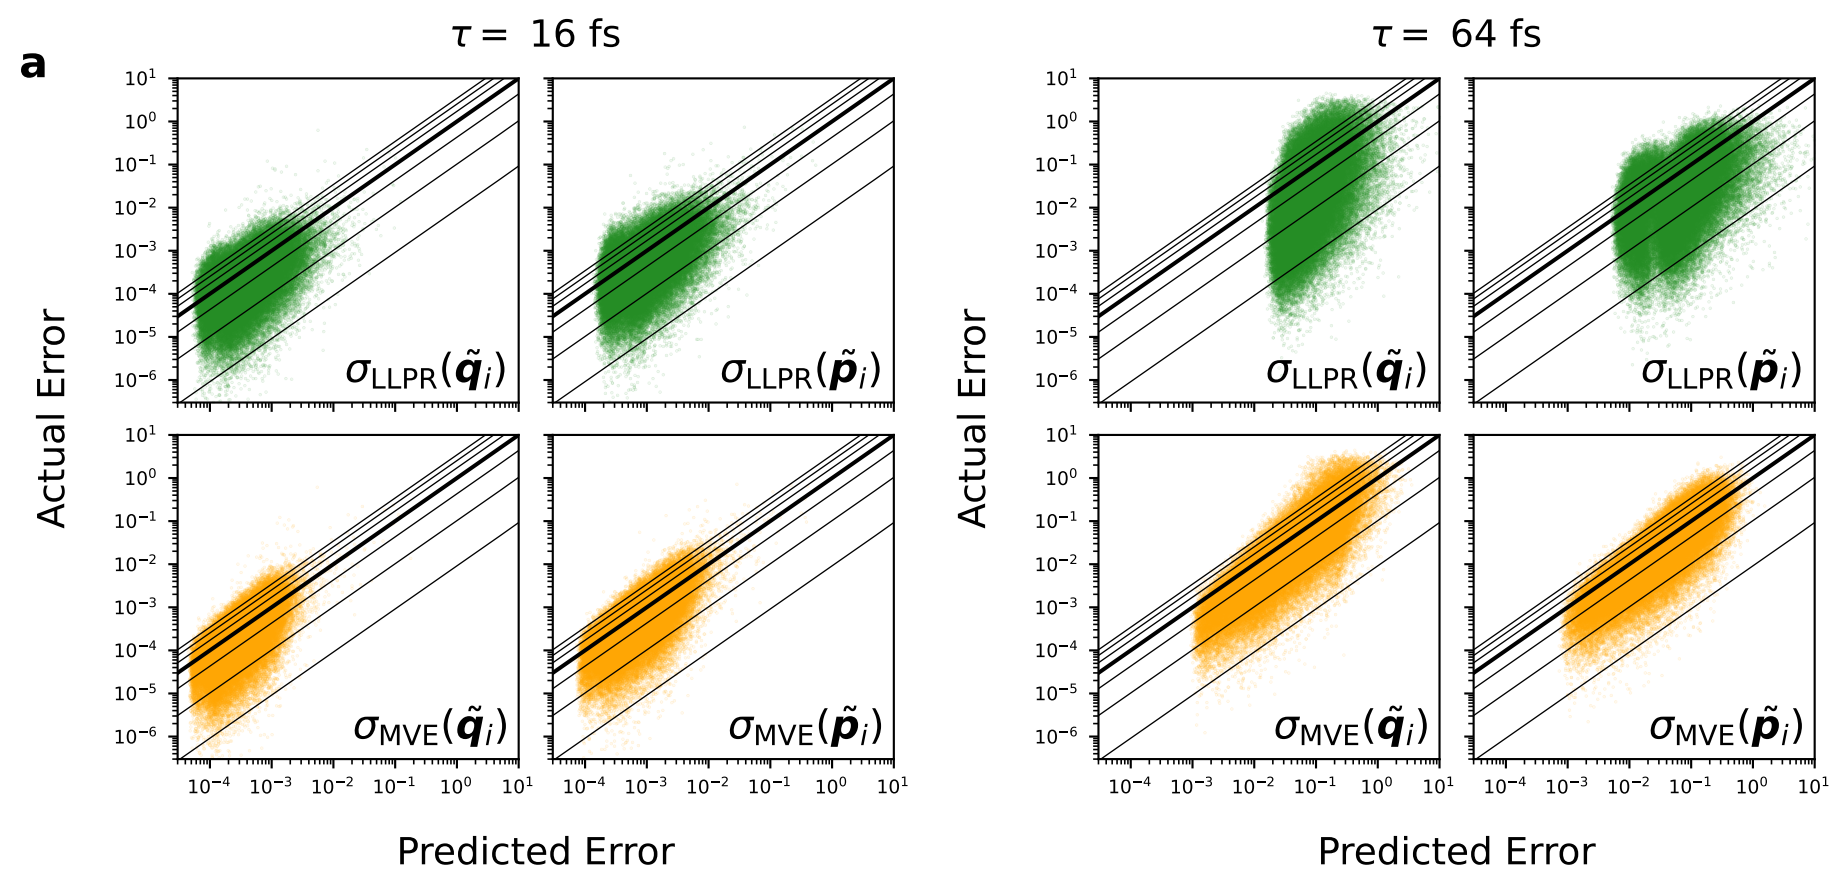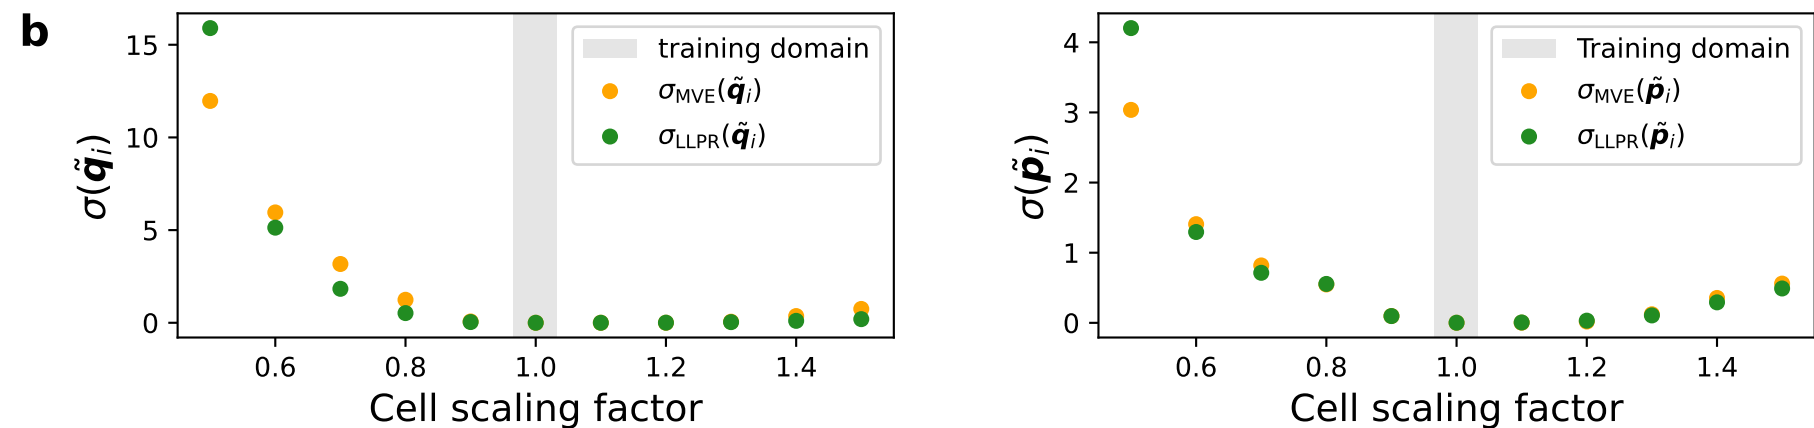

Supplement: Supplementary file 15 [file figure_uq.pdf › flashmd-experiments/plotting/figure_uq.pdf]
